# Supplementary material
Source: PubMed Central journal article supplement (PMC4638042)
Supplement: 10.1074_M115.050724_mcp.M115.050724-1.pdf [file 10.1074_M115.050724_mcp.M115.050724-1.pdf]

## LEGENDS TO SUPPLEMENTAL FIGURES

**Figure S1. Representative examples of protein quantitation data from tau1-441 interactome study.** The graphs depict relative quantitations of peptides underlying the identifications of three proteins and depict data from three biological replicates of tau1-441-EGFP versus EGFP control interactomes. All relative quantitations are presented as ratios of enrichment, with the respective peptide levels observed in one of the three EGFP control affinity capture experiments serving as denominators in all direct comparisons. The plots exemplify proteins, which (A) served as the affinity capture bait (tau), (B) were robustly co-enriched (60S ribosomal protein L35) with the bait; or (C) purified unspecifically with both bait and control matrices (myosin-9).

**Figure S2. Workflow of comparative interactome analysis of N- and C-terminal tau constructs, tau1-255-EGFP and tau256-441-EGFP.** This study was based on four-plex iTRAQ-labeling and contained two additional negative controls, i.e., tau1-255-EGFP and EGFP, to facilitate the direct comparison of binders of full-length and truncated expression constructs.

**Figure S3. Representative examples of protein quantitation data observed in the four separate tau interactome experiments described in this report.** Note that in contrast to Fig. S1, biological replicates are not shown in this panel. Instead, each subpanel depicts the enrichment ratios for a protein of interest in one of the interactome studies conducted (as indicated in the headers of individual data columns). Each of the subfigures A-C represents a detailed data representation of a single data row in Table S3. The plots depict relative peptide enrichment distributions of (A) Hsp90 and (B) STIP1, which bind tau in a manner that is facilitated by (Hsp90) or independent (STIP1) of the presence of RNA, involves preferential interaction with the C-terminal half of tau and exhibit reduced binding to tau1-441(P301L) tau.

(C) Graphs in this panel identified Fus as a candidate tau interactor, whose binding to tau is promoted in the absence of RNA, is directed toward the tau N-terminus and is slightly enhanced toward P301L mutant tau.

**Figure S4. Examples of protein quantitation data in global proteome analysis.**

(A) The identification and quantitation of tau confirmed the reproducible expression of this protein only in HEK-293 lysates, which had been transiently transfected with the tau1-255-EGFP expression construct. (B) Evidence of reproducibly increased cystatin B levels in cells that express tau1-255-EGFP. (C) Myosin-9 levels are not affected by tau1-255-EGFP or EGFP expression. Highly similar levels of this protein in all cell lysates are shown as an example to illustrate the technical reproducibility of the method. See **Fig. S1** for explanation of symbols.

**Figure S5. Summary of experiments, data tables and raw data files generated in this study.**

**Figure S1****A** isoform Tau-F of microtubule-associated protein tau (IPI00025499.3)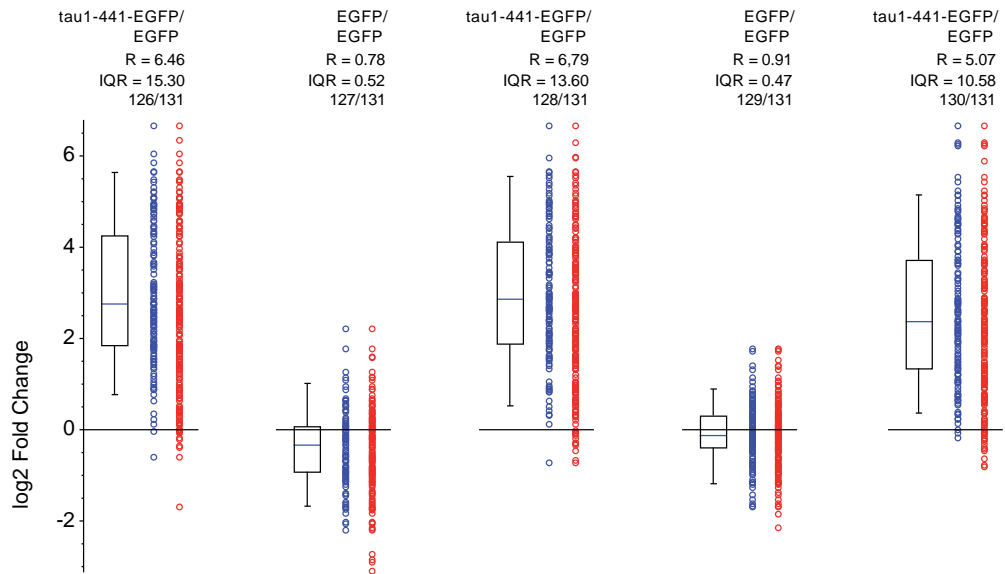**B** 60S ribosomal protein L35 (IPI00412607.6)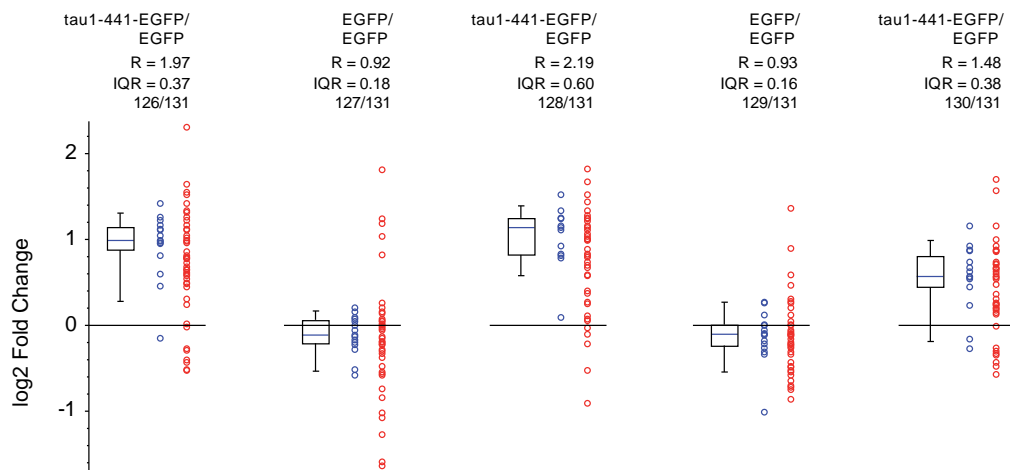**C** isoform 1 of myosin-9 (IPI00019502.3)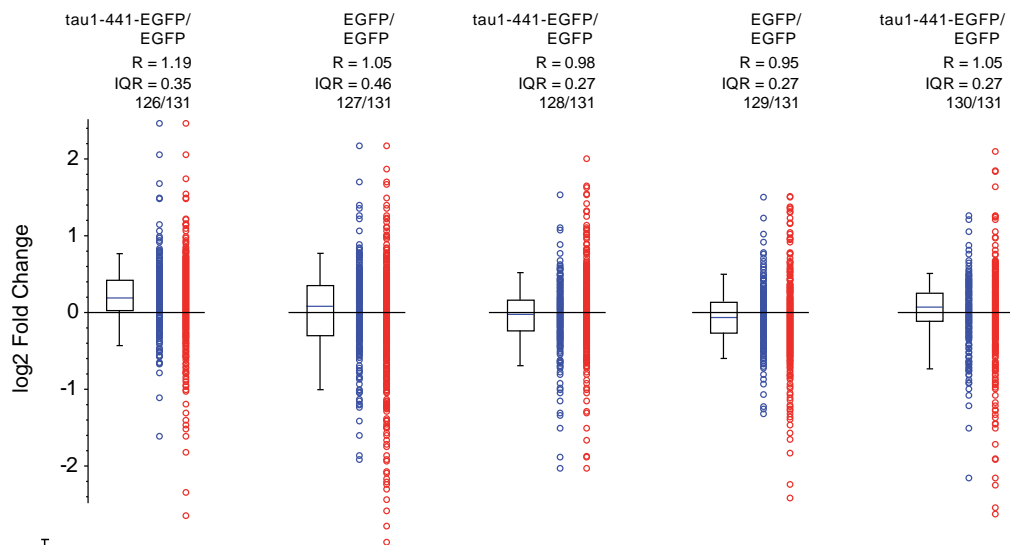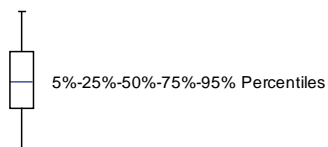

○ Peptides not used for quantification  
 ● Peptides used for quantification

R = Median Peptide Ratio (not in log2)  
 IQR = Inter Quartile Range (not in log2)

**Figure S2**

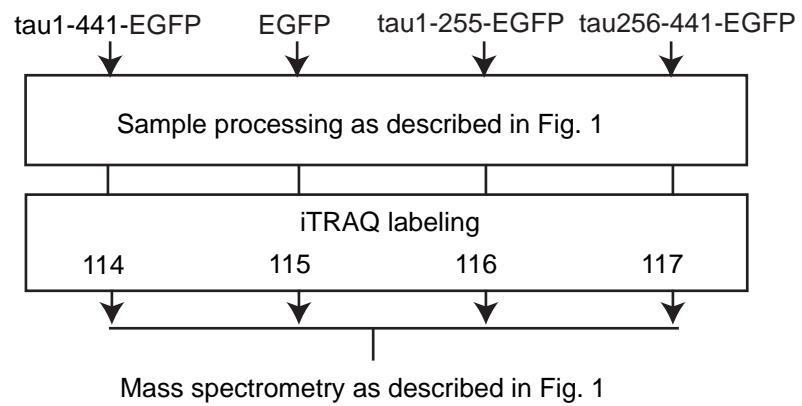

**Figure S3**

**A** Heat shock protein HSP 90-beta (IPI00414676.6)

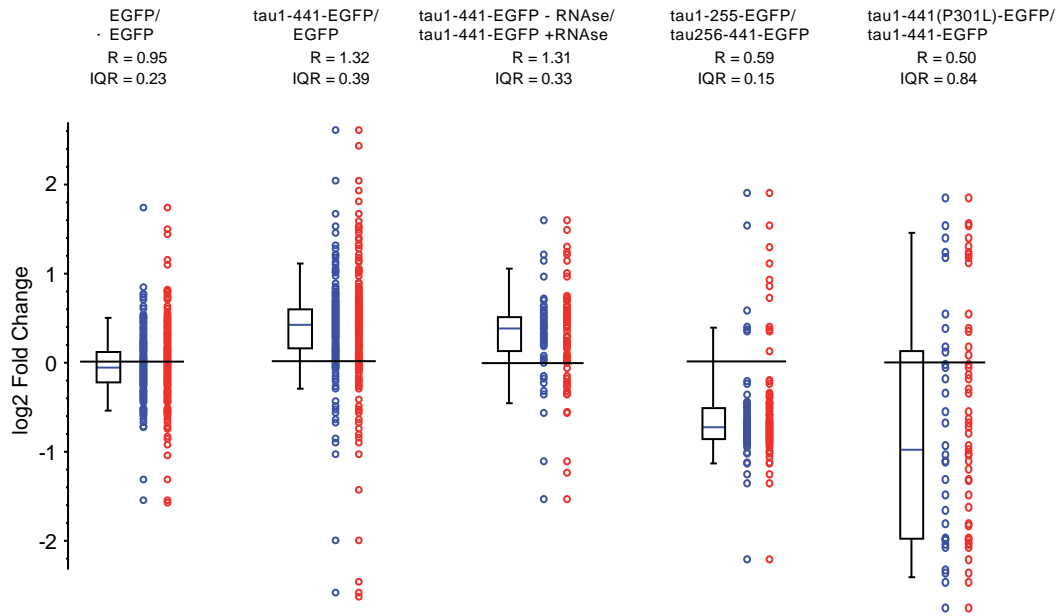

**B** STIP1 protein (IPI00479946.4)

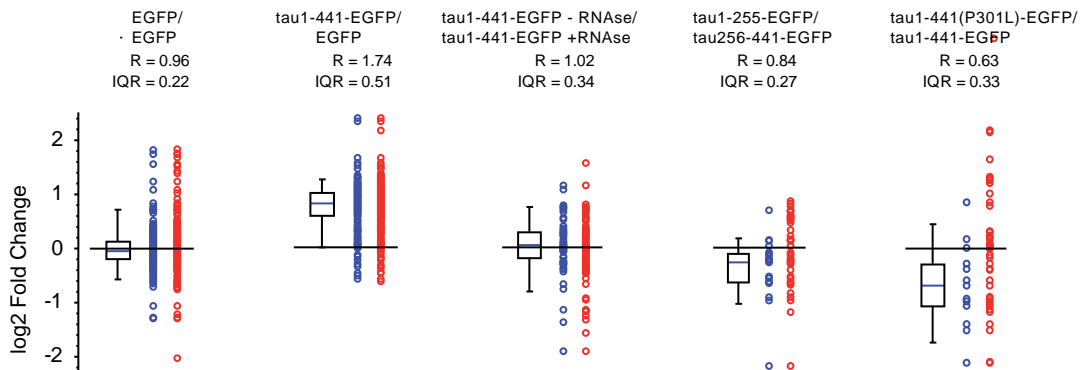

**C** RNA-binding protein FUS isoform 3 (IPI00645208.3)

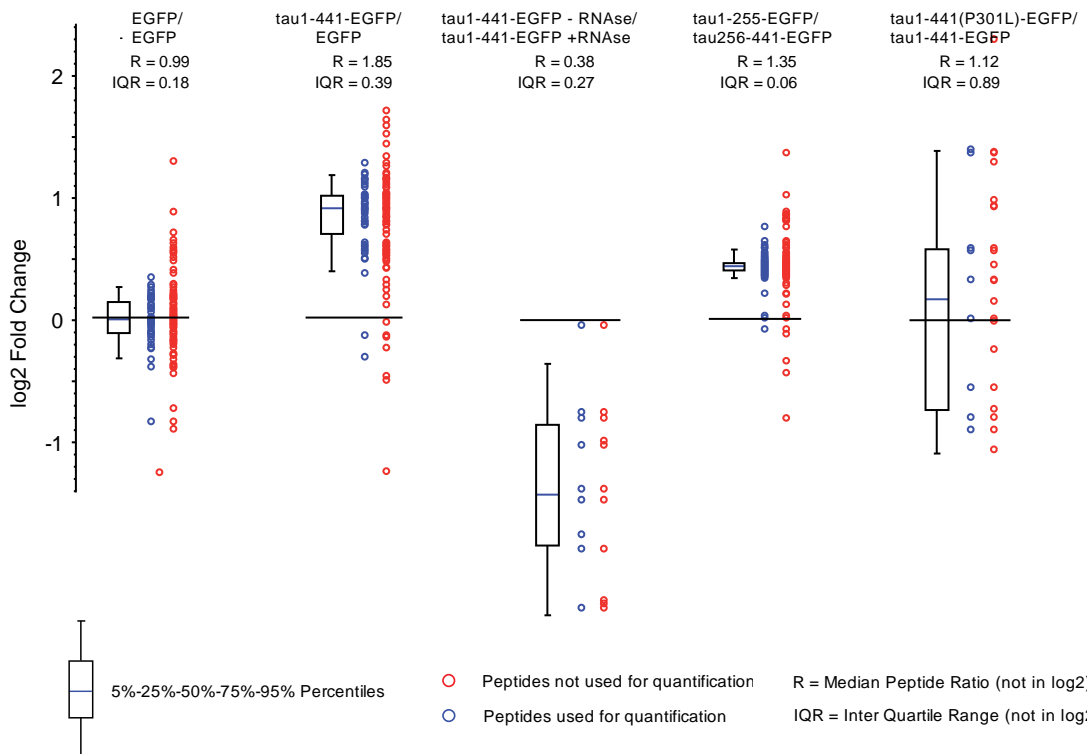

**Figure S4****A** isoform Tau-C of microtubule-associated protein tau (IPI00220174.4)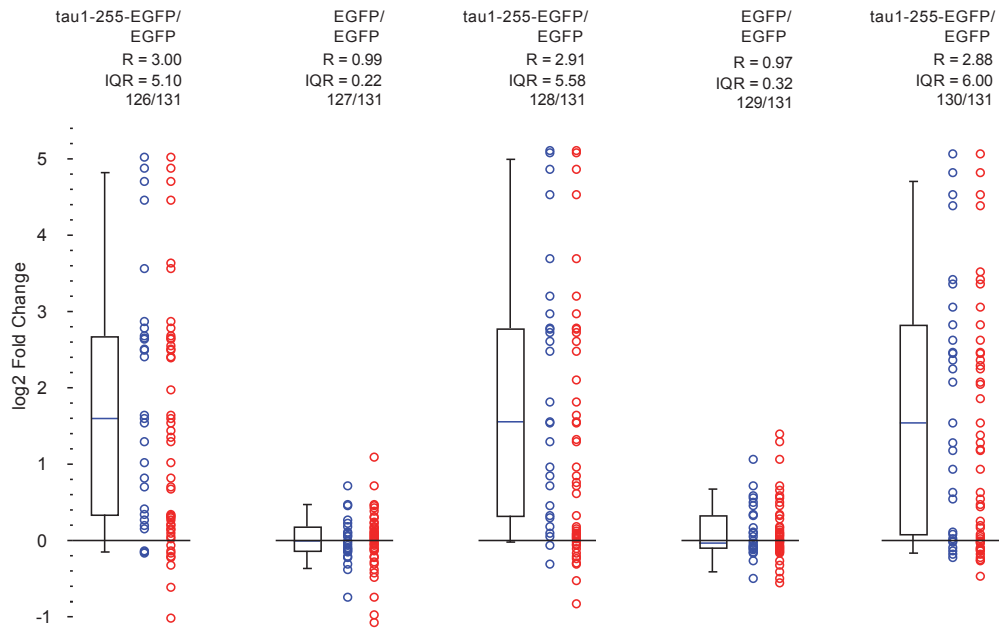**B** Cystatin B (IPI00021828.1)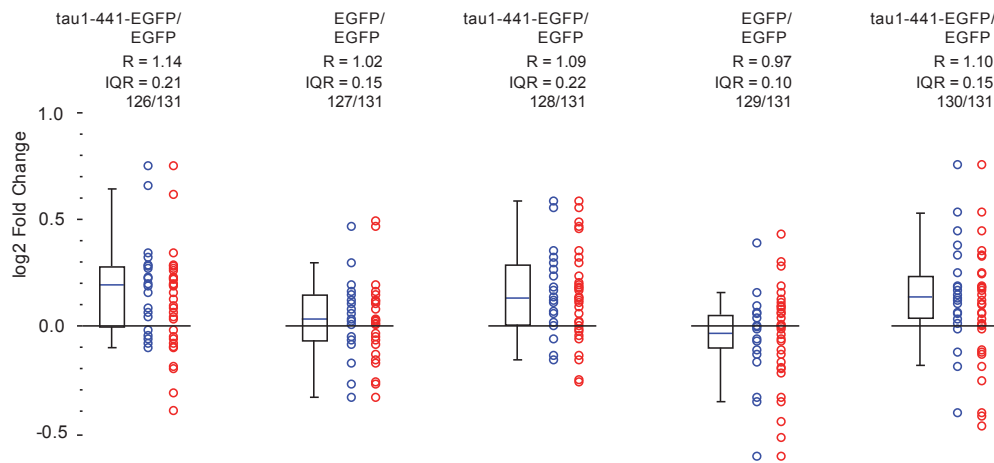**C** isoform 1 of myosin-9 (IPI00019502.3)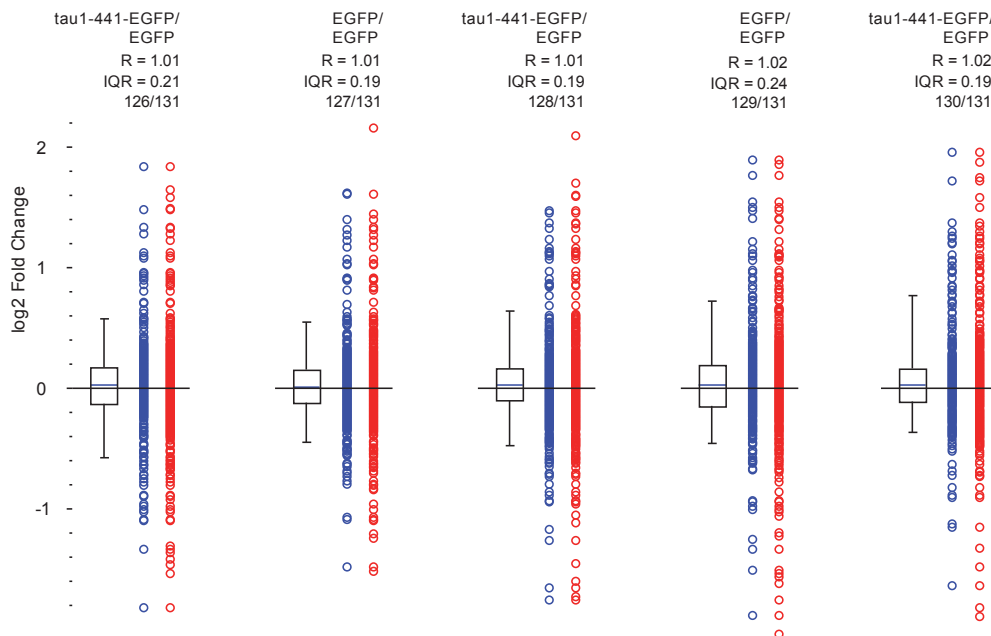

**Figure S5.** Summary of experiments, data tables and raw data files generated in this study

| experiment number | host cell | comparison           |                              | affinity capture matrix | type of study | Suppl. Table (data column) |
|-------------------|-----------|----------------------|------------------------------|-------------------------|---------------|----------------------------|
|                   |           | samples              | controls                     |                         |               |                            |
| 1                 | SH-SY5Y   | tau1-441-EGFP        | EGFP                         | GBP <sup>b</sup>        | interactome   | <b>S1, S2, S3(1)</b>       |
| 2                 | SH-SY5Y   | tau1-255-EGFP        | tau256-441-EGFP <sup>1</sup> | GBP                     | interactome   | <b>S3 (2)</b>              |
| 3                 | SH-SY5Y   | tau1-441-EGFP        | tau1-441 + RNase             | GBP                     | interactome   | <b>S3 (3)</b>              |
| 4                 | SH-SY5Y   | tau1-441(P301L)-EGFP | tau1-441-EGFP                | GBP                     | interactome   | <b>S3 (4)</b>              |
| 5                 | HEK293    | tau1-255-EGFP        | EGFP                         | N/A                     | global        | <b>S4</b>                  |

| experiment number | isobaric label | isobaric label assignments |               |                                  |     | number of deposited raw data files <sup>c</sup> |     |
|-------------------|----------------|----------------------------|---------------|----------------------------------|-----|-------------------------------------------------|-----|
|                   |                | samples                    | controls      | additional controls <sup>a</sup> |     | C18                                             | SCX |
| 1                 | 6-plex TMT     | 126, 128, 130              | 127, 129, 131 | N/A                              | N/A | 3                                               | 3   |
| 2                 | 4-plex iTRAQ   | 116                        | 117           | 114                              | 115 | 3                                               | 2   |
| 3                 | 6-plex TMT     | 126, 128, 130              | 127, 129, 131 | N/A                              | N/A | 3                                               | 3   |
| 4                 | 6-plex TMT     | 127, 129, 131              | 126, 128, 130 | N/A                              | N/A | 3                                               | -   |
| 5                 | 6-plex TMT     | 126, 128, 130              | 127, 129, 131 | N/A                              | N/A | 3                                               | 3   |

<sup>a</sup>see also **Fig. S2** for nature of additional controls

<sup>b</sup>GFP binding protein (GBP)

<sup>c</sup>C18 or SCX refers to ZipTip clean-up method applied to peptide mixtures before mass spectrometry analysis











**Table S2:** Tau candidate interactors comprising one or more RNA recognition motif (RRM) domains

| Accession     | Description                                                 | Symbol       | Chromosome | Amino acids |
|---------------|-------------------------------------------------------------|--------------|------------|-------------|
| IPI00909622.1 | Cleavage stimulation factor, 3' pre-RNA, subunit 2          | CSTF2        | Xq22.1     | 553         |
| IPI00290460.3 | Eukaryotic translation initiation factor 3 subunit G        | EIF3G        | 19p13.2    | 320         |
| IPI00893431.2 | Eukaryotic translation initiation factor 3, subunit B       | EIF3B        | 7p22.3     | 738         |
| IPI01022506.1 | Eukaryotic translation initiation factor 4B isoform 1       | EIF4B        | 12q13.13   | 616         |
| IPI00260715.5 | Fus-like protein, partial                                   | FUS          | 16p11.2    | 528         |
| IPI00011913.1 | Heterogeneous nuclear ribonucleoprotein A0                  | HNRNPA0      | 5q31       | 305         |
| IPI00909232.1 | Heterogeneous nuclear ribonucleoprotein C                   | HNRNPC       | 14q11.2    | 288         |
| IPI00027834.3 | Heterogeneous nuclear ribonucleoprotein L isoform a         | HNRNPL       | 19q13.2    | 589         |
| IPI00383296.5 | Heterogeneous nuclear ribonucleoprotein M isoform b         | HNRNPM       | 19p13.2    | 691         |
| IPI00018140.3 | Heterogeneous nuclear ribonucleoprotein Q isoform 1         | SYNCRIP      | 6q14-q15   | 623         |
| IPI00414696.1 | Heterogeneous nuclear ribonucleoproteins A2/B1 isoform A2   | HNRNPA2B1    | 7p15       | 341         |
| IPI00607677.1 | HUD4                                                        | ELAVL4       | 1p34       | 383         |
| IPI00658000.3 | Insulin-like growth factor 2 mRNA-binding protein 3         | IGF2BP3      | 7p11       | 579         |
| IPI00009032.1 | Lupus La protein                                            | SSB          | 2q31.1     | 408         |
| IPI00789551.1 | Matrin-3                                                    | MATR3        | 5q31.2     | 895         |
| IPI00154590.6 | MKI67 FHA domain-interacting nucleolar phosphoprotein       | NIFK,MKI67IP | 2q14.3     | 293         |
| IPI00304596.3 | Non-POU domain-containing octamer-binding protein isoform 1 | NONO         | Xq13.1     | 471         |
| IPI00604620.3 | Nucleolin                                                   | NCL          | 2q37.1     | 710         |
| IPI00008524.1 | Polyadenylate-binding protein 1                             | PABPC1       | 8q22.2-q23 | 636         |
| IPI00642904.1 | Polyadenylate-binding protein 4 isoform 1                   | PABPC4       | 1p34.2     | 660         |
| IPI00179964.5 | Polypyrimidine tract-binding protein 1 isoform c            | PTBP1        | 19p13.3    | 531         |
| IPI00012442.1 | Ras GTPase-activating protein-binding protein 1             | G3BP1        | 5q33.1     | 466         |
| IPI00009057.2 | Ras GTPase-activating protein-binding protein 2 isoform a   | G3BP2        | 4q21.1     | 482         |
| IPI00304692.1 | RNA-binding motif protein, X chromosome isoform 1           | RBMX         | Xq26.3     | 391         |
| IPI00010740.1 | Splicing factor, proline- and glutamine-rich                | SFPQ         | 1p34.3     | 707         |
| IPI00971018.1 | TAR DNA-binding protein 43                                  | TARDBP       | 1p36.22    | 414         |
| IPI00910884.1 | Unnamed protein product                                     | MSI2         | 17q22      | 324         |



|              |                                                                                          |        |    |    |     |       |       |      |       |       |       |       |       |       |       |       |       |      |       |       |      |      |
|--------------|------------------------------------------------------------------------------------------|--------|----|----|-----|-------|-------|------|-------|-------|-------|-------|-------|-------|-------|-------|-------|------|-------|-------|------|------|
| IP0002639.1  | Isomorf 1 of Protein LMS1 homolog B                                                      | 72.216 | 8  | 2  | 32  | 223   | 1.242 | 25.0 | 14    | 1.156 | 22.7  | 4     | 1.620 | 14.8  | 9     | 1.542 | 9.4   | 2    | 385   | 42.0  | 9.69 |      |
| IP0064181.5  | MARCKS-related protein 2                                                                 | 72.216 | 1  | 1  | 209 | 1.029 | 1.0   | 27   | 1.029 | 7.5   | 3     | 0.708 | 1.0   | 9     | 0.913 | 2.7   | 1.227 | 49.6 | 65    | 31.5  | 4.67 |      |
| IP0021930.7  | Methylated-lysine rich C-tail subunit                                                    | 66.676 | 1  | 10 | 16  | 295   | 1.361 | 22.7 | 47    | 1.815 | 25.4  | 5     | 1.815 | 8.7   | 7     | 1.651 | 56.2  | 24   | 332   | 31.5  | 4.45 |      |
| IP0080007.2  | Microtubule-associated protein 8                                                         | 66.676 | 9  | 7  | 174 | 952   | 1.709 | 34.5 | 85    | 0.785 | 47.1  | 25    | 0.831 | 187   | 63    | 1.352 | 39.4  | 31   | 2297  | 245.3 | 6.23 |      |
| IP0000864.4  | Microtubule-associated protein 8B                                                        | 62.164 | 9  | 7  | 174 | 952   | 1.709 | 34.5 | 85    | 0.785 | 47.1  | 25    | 0.831 | 187   | 63    | 1.352 | 39.4  | 31   | 2297  | 245.3 | 6.23 |      |
| IP0002113.1  | Isomorf 2 of Microtubule-associated protein 8                                            | 75.086 | 1  | 1  | 84  | 662   | 1.710 | 35.1 | 73    | 0.940 | 55.9  | 21    | 1.241 | 171   | 55    | 1.550 | 33.5  | 30   | 979   | 102.8 | 5.47 |      |
| IP0001759.3  | Microtubule-associated protein RP/EB family member 1                                     | 73.306 | 5  | 9  | 26  | 142   | 0.962 | 13.2 | 24    | 0.612 | 34.9  | 5     | 1.017 | 31    | 2     | 0.648 | 43.4  | 2    | 288   | 30.0  | 5.14 |      |
| IP0004630.4  | Peptidyl-prolyl cis-trans isomerase B                                                    | 74.148 | 1  | 13 | 23  | 142   | 1.164 | 18.1 | 19    | 0.543 | 39.1  | 1     | 1.070 | 9.2   | 4     | 0.881 | 124.0 | 1    | 216   | 23.7  | 7.91 |      |
| IP0002415.1  | Proteinase K                                                                             | 85.276 | 4  | 18 | 31  | 168   | 1.268 | 23.3 | 39    | 0.727 | 123.9 | 21    | 2.088 | 6.8   | 107   | 2.288 | 6.8   | 27   | 242   | 23.7  | 25.2 |      |
| IP0001610.2  | Poly(I:C)-binding protein 1                                                              | 96.316 | 10 | 14 | 37  | 979   | 1.126 | 18.1 | 194   | 1.433 | 26.7  | 56    | 1.171 | 30.1  | 17    | 0.638 | 70.0  | 2    | 356   | 37.5  | 7.09 |      |
| IP0002581.1  | Isomorf 1 of Poly(I:C)-binding protein 1                                                 | 91.676 | 21 | 26 | 63  | 1133  | 1.063 | 26.3 | 145   | 0.967 | 36.5  | 65    | 1.039 | 16.3  | 145   | 0.967 | 36.5  | 65   | 636   | 70.0  | 9.50 |      |
| IP0005740.7  | Isomorf 2 of Poly(I:C)-binding protein 1                                                 | 87.166 | 16 | 67 | 58  | 1.508 | 25.3  | 50   | 1.012 | 10.1  | 2.028 | 12.9  | 1.039 | 12.6  | 65    | 0.797 | 27.0  | 11   | 611   | 65.5  | 6.92 |      |
| IP0017094.5  | Isomorf 1 of Poly(I:C)-binding protein 1                                                 | 90.906 | 10 | 18 | 39  | 868   | 1.654 | 14.1 | 58    | 1.007 | 29.0  | 32    | 1.039 | 12.6  | 23    | 0.526 | 84.6  | 7    | 931   | 57.2  | 11.7 |      |
| IP0000002.3  | Protein subunit 7                                                                        | 79.276 | 1  | 9  | 15  | 258   | 1.414 | 17.9 | 19    | 0.313 | 4.3   | 0.073 | 37.3  | 50    | 0.682 | 57.4  | 14    | 129  | 146   | 16.6  | 8.88 |      |
| IP0005671.1  | Protein subunit 6                                                                        | 82.956 | 2  | 11 | 120 | 245   | 1.530 | 17.7 | 19    | 1.642 | 5.0   | 0.376 | 9.1   | 23    | 1.030 | 113.0 | 1     | 129  | 146   | 16.6  | 8.88 |      |
| IP0000968.1  | Pre-mRNA-processing factor 19                                                            | 55.956 | 3  | 14 | 24  | 228   | 1.184 | 29.5 | 21    | 1.163 | 25.6  | 10    | 1.179 | 13.2  | 9     | 1.328 | 29.2  | 3    | 504   | 55.1  | 6.61 |      |
| IP0000968.4  | Pre-mRNA-processing factor 19B                                                           | 58.896 | 4  | 30 | 149 | 596   | 1.160 | 19.0 | 46    | 0.978 | 38.3  | 23    | 0.841 | 73.6  | 9     | 0.913 | 11.7  | 235  | 274.2 | 8.84  | 8.84 |      |
| IP0001972.2  | Proteinase 3 subunit 1                                                                   | 86.146 | 4  | 12 | 25  | 256   | 1.374 | 7.7  | 44    | 1.152 | 25.1  | 14    | 0.779 | 31.4  | 43    | 1.011 | 68.7  | 2    | 267   | 30.9  | 6.11 |      |
| IP0021845.1  | Isomorf 2 of 26S proteasome non-ATPase regulatory subunit 1                              | 70.526 | 6  | 35 | 72  | 437   | 1.308 | 20.2 | 77    | 1.148 | 15.5  | 18    | 0.824 | 26.5  | 19    | 0.559 | 166.7 | 2    | 953   | 100.9 | 5.39 |      |
| IP0001228.3  | 26S proteasome non-ATPase regulatory subunit 2                                           | 73.466 | 9  | 30 | 63  | 437   | 1.364 | 16.1 | 86    | 1.235 | 20.3  | 17    | 0.868 | 15    | 0.467 | 159.0 | 2     | 908  | 100.9 | 5.39  |      |      |
| IP0001163.2  | 26S proteasome non-ATPase regulatory subunit 3                                           | 85.526 | 4  | 30 | 70  | 506   | 1.448 | 18.9 | 89    | 1.220 | 26.4  | 27    | 0.532 | 60.6  | 24    | 0.733 | 72.3  | 6    | 354   | 60.9  | 8.44 |      |
| IP0001839.4  | 26S protease regulatory subunit 7                                                        | 84.726 | 5  | 14 | 25  | 217   | 1.224 | 20.1 | 89    | 1.221 | 25.4  | 0.652 | 54.5  | 10    | 0.841 | 89.9  | 3     | 377  | 40.7  | 4.79  |      |      |
| IP0001112.6  | 26S protease regulatory subunit 8                                                        | 79.076 | 3  | 25 | 301 | 1.373 | 13.2  | 87   | 1.112 | 10.0  | 0.629 | 50.5  | 10    | 0.629 | 50.5  | 10    | 0.629 | 50.5 | 10    | 440   | 82.2 | 9.21 |
| IP0001839.4  | 26S protease regulatory subunit 6A                                                       | 79.956 | 10 | 22 | 36  | 361   | 1.436 | 12.7 | 76    | 1.218 | 18.6  | 17    | 0.465 | 32.9  | 16    | 0.535 | 104.2 | 2    | 439   | 49.2  | 5.24 |      |
| IP0002439.3  | 26S protease regulatory subunit 7                                                        | 86.146 | 3  | 25 | 301 | 1.373 | 13.2  | 87   | 1.112 | 10.0  | 0.629 | 50.5  | 10    | 0.629 | 50.5  | 10    | 0.629 | 50.5 | 10    | 440   | 82.2 | 9.21 |
| IP0007450.2  | 26S protease regulatory subunit 8 isomorf 2                                              | 74.476 | 8  | 19 | 42  | 239   | 1.313 | 12.0 | 55    | 1.447 | 27.2  | 9     | 0.438 | 51.0  | 9     | 0.837 | 18.0  | 3    | 423   | 47.5  | 4.68 |      |
| IP0001058.3  | Proteinase 26S non-ATPase subunit 11 variant (Fragment)                                  | 82.026 | 2  | 15 | 48  | 213   | 1.409 | 13.0 | 31    | 1.408 | 43.1  | 7     | 0.500 | 97.3  | 4     | 0.844 | 147.7 | 2    | 456   | 52.9  | 7.65 |      |
| IP0001839.4  | Isomorf 2 of 26S proteasome non-ATPase regulatory subunit 13                             | 74.476 | 1  | 8  | 21  | 133   | 1.352 | 20.5 | 23    | 1.141 | 26.1  | 5     | 0.753 | 24.6  | 4     | 0.657 | 48.3  | 6    | 310   | 34.6  | 5.12 |      |
| IP0002482.1  | Isomorf Long of Proteasome subunit alpha type 1                                          | 78.076 | 4  | 17 | 29  | 301   | 1.509 | 23.7 | 52    | 1.206 | 35.2  | 13    | 0.529 | 23.9  | 12    | 0.643 | 99.4  | 2    | 269   | 30.2  | 7.43 |      |
| IP0001242.4  | Protein subunit alpha type 2                                                             | 59.406 | 4  | 9  | 12  | 137   | 1.294 | 50.3 | 13    | 1.343 | 31.1  | 1     | 0.729 | 11.2  | 1     | 0.729 | 11.2  | 1    | 248   | 74.3  | 7.43 |      |
| IP0002800.1  | Protein subunit beta type 2                                                              | 58.716 | 4  | 4  | 12  | 83    | 1.530 | 23.9 | 15    | 1.509 | 26.9  | 2     | 1.502 | 57.8  | 4     | 0.853 | 91.6  | 2    | 201   | 22.8  | 7.02 |      |
| IP0001473.3  | Isomorf 1 of Proteasome subunit alpha type 2                                             | 69.356 | 9  | 11 | 24  | 180   | 1.464 | 17.0 | 38    | 1.021 | 27.6  | 4     | 0.866 | 70.6  | 6     | 0.847 | 55.9  | 4    | 248   | 27.9  | 8.44 |      |
| IP0002312.3  | Protein subunit beta type 2                                                              | 64.896 | 7  | 12 | 19  | 142   | 1.429 | 18.9 | 17    | 1.429 | 18.9  | 17    | 1.429 | 18.9  | 17    | 1.429 | 18.9  | 17   | 277   | 63.1  | 9.44 |      |
| IP0000000.2  | Isomorf Long of Double-stranded RNA-binding protein Staufen homolog 1                    | 80.486 | 16 | 14 | 56  | 375   | 1.520 | 22.3 | 51    | 1.109 | 86.9  | 12    | 1.432 | 21.4  | 9     | 0.745 | 68.8  | 8    | 538   | 59.0  | 9.55 |      |
| IP00014481.2 | Isomorf 2 of Double-stranded RNA-binding protein Staufen homolog 1                       | 80.486 | 16 | 14 | 56  | 375   | 1.520 | 22.3 | 51    | 1.109 | 86.9  | 12    | 1.432 | 21.4  | 9     | 0.745 | 68.8  | 8    | 538   | 59.0  | 9.55 |      |
| IP0001268.2  | CDNA FL27422, highly similar to RNA-binding protein, autoantigenic, transcript variant 1 | 65.136 | 1  | 1  | 26  | 146   | 1.313 | 15.6 | 11    | 1.558 | 11.1  | 1     | 1.385 | 10.1  | 1     | 0.911 | 60.1  | 1    | 476   | 52.2  | 5.43 |      |
| IP0004579.1  | Cold inducible RNA-binding protein, isoform CMA_C                                        | 53.544 | 5  | 10 | 26  | 488   | 1.450 | 12.0 | 14    | 0.617 | 41.8  | 2     | 1.361 | 9.5   | 78    | 1.075 | 28.8  | 8    | 297   | 31.9  | 9.61 |      |
| IP0002430.1  | Purative RNA-binding protein                                                             | 59.636 | 1  | 6  | 16  | 89    | 1.574 | 14.7 | 9     | 0.936 | 121.9 | 2     | 1.502 | 70.8  | 6     | 1.014 | 28.8  | 1    | 157   | 17.2  | 8.91 |      |
| IP0000187.8  | RNA-binding protein 28                                                                   | 57.076 | 18 | 1  | 16  | 136   | 1.364 | 47.8 | 6     | 1.146 | 6.1   | 1     | 1.146 | 6.1   | 1     | 1.146 | 6.1   | 1    | 749   | 72.9  | 9.22 |      |
| IP0008792.1  | RNA-binding protein EVS isoform 3                                                        | 35.426 | 9  | 9  | 34  | 345   | 1.864 | 20.2 | 38    | 0.446 | 60.1  | 9     | 1.299 | 25.6  | 17    | 1.355 | 27.5  | 8    | 655   | 68.3  | 9.33 |      |
| IP0004208.3  | RNA-binding protein HUS isoform 3                                                        | 45.986 | 7  | 7  | 32  | 516   | 1.864 | 12.9 | 42    | 0.376 | 58.4  | 10    | 1.351 | 11    | 1.009 | 1.122 | 36.8  | 11   | 522   | 53.2  | 9.36 |      |
| IP0002442.1  | Ras GTPase-activating protein-binding protein 1                                          | 71.446 | 11 | 1  | 23  | 149   | 1.931 | 35.8 | 8     | 1.411 | 61.2  | 27    | 1.404 | 21    | 1.404 | 21    | 1.404 | 21   | 466   | 62.6  | 11.4 |      |
| IP0000684.3  | Ras-related protein Rab-18                                                               | 74.836 | 43 | 6  | 20  | 148   | 1.814 | 23.4 | 24    | 1.514 | 11.2  | 2     | 0.538 | 34.8  | 8     | 1.051 | 38.2  | 2    | 201   | 22.2  | 5.73 |      |
| IP00011169.1 | Ras-related protein Rab-2A                                                               | 77.836 | 8  | 3  | 19  | 2     | 1.382 | 19.2 | 13    | 1.791 | 15.1  | 4     | 1.138 | 20.4  | 3     | 1.006 | 266.1 | 2    | 212   | 23.5  | 6.54 |      |
| IP0001244.1  | Uncharacterized protein                                                                  | 72.936 | 1  | 1  | 1   | 163   | 1.410 | 35.8 | 8     | 1.410 | 35.8  | 8     | 1.410 | 35.8  | 8     | 1.410 | 35.8  | 8    | 207   | 23.5  | 6.70 |      |
| IP0001169.1  | Ras-related protein Rab-7a                                                               | 74.886 | 7  | 14 | 20  | 204   | 1.352 | 19.2 | 30    | 1.591 | 5.0   | 2     | 0.538 | 34.8  | 8     | 1.051 | 50.2  | 7    | 207   | 23.5  | 6.70 |      |
| IP0000248.4  | Isomorf 1 of RNA polymerase II-associated protein 3                                      | 70.086 | 3  | 31 | 55  | 445   | 1.542 | 17.3 | 90    | 0.896 | 57.7  | 21    | 1.023 | 27.7  | 15    | 0.675 | 69.8  | 10   | 665   | 75.7  | 6.84 |      |
| IP0002093.3  | CDNA FL27422, highly similar to RNA polymerase II-associated protein 3                   | 74.706 | 1  | 1  | 1   | 137   | 1.474 | 16.0 | 49    | 1.474 | 16.0  | 49    | 1.474 | 16.0  | 49    | 1.474 | 16.0  | 49   | 247   | 24.7  | 6.84 |      |
| IP0002117.4  | Isomorf 1 of RuvB-like 1                                                                 | 84.656 | 5  | 23 | 39  | 307   | 1.420 | 13.6 | 70    | 1.195 | 26.3  | 13    | 0.782 | 26.4  | 26    | 0.442 | 6.5   | 4    | 456   | 50.2  | 6.42 |      |
| IP0000210.7  | RuvB-2                                                                                   | 80.956 | 3  | 24 | 44  | 351   | 1.478 | 19.8 | 77    | 1.541 | 16.2  | 11    | 0.698 | 29.9  | 13    | 0.888 | 36.0  | 7    | 463   | 51.1  | 5.64 |      |
| IP0001970.7  | Isomorf 2 of Septin-1                                                                    | 53.756 | 1  | 1  | 1   | 111   | 1.609 | 11.1 | 1     | 1.058 | 0.8   | 0.8   | 0.8   | 0.8   | 0.8   | 0.8   | 0.8   | 0.8  | 463   | 41.5  | 6.60 |      |
| IP0001970.7  | Isomorf 1 of Septin-1                                                                    | 81.446 | 18 | 20 | 32  | 345   | 1.361 | 26.0 | 70    | 0.842 | 14.4  | 12    | 0.828 | 15.8  | 18    | 0.508 | 48.4  | 6    | 361   | 41.5  | 6.60 |      |
| IP0002163.9  | Isomorf 1 of Septin-6                                                                    | 85.556 | 8  | 5  | 34  | 279   | 1.502 | 16.7 | 22    | 0.943 | 22.9  | 5     | 0.956 | 14.8  | 13    | 0.792 | 21.8  | 2    | 427   | 48.6  | 8.81 |      |
| IP0001090.1  | Uncharacterized protein                                                                  | 81.096 | 1  | 26 | 27  | 148   | 1.433 | 27.2 | 22    | 0.943 | 22.9  | 5     | 0.956 | 14.8  | 13    | 0.792 | 21.8  | 2    | 427   | 48.6  | 8.81 |      |
| IP0007461.1  | Septin-9 isomorf 4                                                                       | 82.256 | 8  |    |     |       |       |      |       |       |       |       |       |       |       |       |       |      |       |       |      |      |

|              |                                                                                   |        |    |    |     |      |       |      |     |       |       |    |       |       |     |       |       |    |      |       |       |
|--------------|-----------------------------------------------------------------------------------|--------|----|----|-----|------|-------|------|-----|-------|-------|----|-------|-------|-----|-------|-------|----|------|-------|-------|
| IP00550746.4 | Nuclear migration protein nuuC                                                    | 70.39% | 4  | 16 | 32  | 243  | 1.380 | 16.9 | 39  | 1.296 | 45.2  | 4  | 0.744 | 38.4  | 9   | 0.797 | 107.6 | 7  | 331  | 38.2  | 5.38  |
| IP00031812.3 | Nucleic-acid-sensitive element binding protein 1                                  | 70.73% | 5  | 9  | 30  | 2027 | 0.783 | 24.3 | 154 | 0.244 | 198.6 | 30 | 1.151 | 12.6  | 179 | 1.240 | 21.9  | 16 | 324  | 35.9  | 9.28  |
| IP00216654.2 | Isoform Beta of Nuclear and coiled-body phosphoprotein 1                          | 49.51% | 3  | 15 | 50  | 180  | 1.954 | 9.8  | 5   | 1.699 | 66.3  | 6  | 0.809 | 11.3  | 14  | 1.946 | 55.1  | 11 | 709  | 24.7  | 9.47  |
| IP00604620.3 | Nucleolin                                                                         | 79.58% | 11 | 58 | 101 | 2519 | 1.628 | 18.8 | 102 | 0.659 | 55.8  | 53 | 1.103 | 6.7   | 623 | 1.726 | 18.0  | 48 | 710  | 76.6  | 4.70  |
| IP00549246.4 | Isoform 1 of Nucleophosmin                                                        | 84.01% | 5  | 23 | 33  | 1092 | 1.595 | 13.2 | 72  | 1.379 | 27.6  | 38 | 1.364 | 5.1   | 214 | 1.151 | 37.8  | 24 | 294  | 32.6  | 4.78  |
| IP00941461.1 | Nucleosome assembly protein 1-like 4                                              | 75.73% | 15 | 17 | 30  | 389  | 1.228 | 14.3 | 105 | 0.860 | 28.1  | 7  | 0.729 | 37.2  | 5   | 0.869 | 52.2  | 4  | 375  | 42.8  | 4.69  |
| IP00305092.7 | Isoform 1 of Partner of Y14 and mago                                              | 86.70% | 2  | 10 | 18  | 221  | 1.426 | 29.2 | 21  | 0.941 | 165.5 | 9  | 1.152 | 25.8  | 13  | 1.503 | 35.1  | 8  | 204  | 22.6  | 9.45  |
| IP00709005.2 | PEST proteolytic signal containing nuclear protein, isoform CRA_a                 | 66.83% | 3  | 6  | 19  | 122  | 1.369 | 25.1 | 20  | 1.472 | 24.8  | 6  | 1.321 | 14.8  | 3   | 0.869 | 5.7   | 3  | 199  | 20.9  | 8.27  |
| IP00006167.1 | Protein phosphatase 5G                                                            | 55.13% | 3  | 18 | 34  | 194  | 1.078 | 20.2 | 34  | 0.835 | 5.3   | 3  | 0.938 | 22.3  | 6   | 1.582 | 67.8  | 3  | 546  | 59.2  | 4.36  |
| IP00470497.3 | Isoform 2 of Plasminogen activator inhibitor 1 RNA-binding protein                | 72.14% | 2  | 3  | 42  | 862  | 1.890 | 25.5 | 80  | 0.969 | 51.8  | 34 | 2.449 | 7.4   | 160 | 1.347 | 23.4  | 14 | 402  | 44.2  | 8.66  |
| IP00214088.3 | Isoform 1 of Pleckstrin                                                           | 57.00% | 12 | 37 | 206 | 925  | 0.817 | 27.8 | 68  | 1.544 | 37.3  | 21 | 2.028 | 6.5   | 15  | 0.816 | 54.3  | 2  | 4668 | 511.5 | 5.96  |
| IP00409040.5 | Poly (ADP-ribose) polymerase 1                                                    | 71.10% | 5  | 44 | 91  | 1234 | 1.170 | 19.7 | 137 | 0.792 | 46.9  | 32 | 1.179 | 18.7  | 7   | 1.128 | 42.1  | 4  | 1014 | 113.0 | 8.88  |
| IP00739539.6 | POE1 ankyrin domain family member F                                               | 61.77% | 7  | 1  | 65  | 752  | 1.061 | 18.7 | 50  | 0.785 | 46.9  | 16 | 0.747 | 7.4   | 175 | 1.397 | 40.9  | 7  | 1075 | 121.4 | 6.20  |
| IP00299000.5 | Proliferation-associated protein 2G4                                              | 89.14% | 7  | 25 | 38  | 778  | 1.078 | 36.0 | 69  | 0.970 | 132.1 | 46 | 2.026 | 7.2   | 147 | 1.218 | 24.1  | 19 | 394  | 41.8  | 9.56  |
| IP00081761.5 | Isoform 7 of Protein PRC2C                                                        | 50.14% | 11 | 41 | 152 | 608  | 1.486 | 31.2 | 59  | 1.181 | 32.9  | 24 | 1.411 | 56.6  | 7   | 1.743 | 41.1  | 4  | 2898 | 316.9 | 9.13  |
| IP0046044.2  | Protein RCC2                                                                      | 57.85% | 1  | 14 | 33  | 192  | 1.361 | 19.7 | 21  | 0.727 | 72.2  | 10 | 1.023 | 20.3  | 16  | 1.243 | 65.7  | 4  | 522  | 56.0  | 8.78  |
| IP00159072.3 | regulator of differentiation 1 Isoform 2                                          | 45.43% | 12 | 1  | 21  | 132  | 1.546 | 29.9 | 7   | 1.120 | 27.3  | 3  | 2.096 | 24.4  | 6   | 0.941 | 177.0 | 4  | 524  | 56.8  | 9.20  |
| IP00399170.1 | Isoform 2 of Regulator of nonsense transcripts 1                                  | 50.27% | 2  | 27 | 63  | 317  | 1.313 | 35.7 | 43  | 1.152 | 30.0  | 18 | 1.782 | 26.1  | 6   | 0.825 | 56.7  | 2  | 1118 | 123.0 | 6.48  |
| IP0017412.1  | Isoform 1 of Replication factor C subunit 2                                       | 72.03% | 3  | 9  | 23  | 126  | 1.272 | 11.7 | 16  | 1.652 | 28.6  | 5  | 0.950 | 8.5   | 6   | 0.804 | 144.3 | 2  | 354  | 39.1  | 6.44  |
| IP00031521.1 | Replication factor C subunit 3                                                    | 36.18% | 4  | 7  | 26  | 163  | 1.846 | 19.9 | 17  | 1.091 | 23.6  | 3  | 0.575 | 2.8   | 2   | 0.717 | 31.7  | 3  | 358  | 40.5  | 8.94  |
| IP00902661.1 | Isoform 5 of Rib. guanine nucleotide exchange factor 7                            | 75.65% | 8  | 9  | 67  | 489  | 1.147 | 21.0 | 105 | 1.012 | 55.9  | 7  | 0.582 | 30.2  | 13  | 1.776 | 134.1 | 4  | 731  | 82.5  | 8.84  |
| IP00782592.3 | Isoform 1 of Serine/arginine repetitive matrix protein 2                          | 74.64% | 5  | 15 | 280 | 794  | 0.989 | 13.1 | 7   | 0.176 | 4.0   | 5  | 0.991 | 83.4  | 3   | 1.716 | 38.1  | 4  | 2752 | 299.4 | 12.06 |
| IP00102041.1 | Serine/arginine-rich splicing factor 3                                            | 68.95% | 4  | 6  | 17  | 251  | 1.888 | 18.7 | 14  | 0.612 | 54.5  | 4  | 1.829 | 8.6   | 28  | 1.144 | 84.4  | 3  | 164  | 19.3  | 11.65 |
| IP00554737.3 | Serine/threonine protein phosphatase 2A 65 kDa regulatory subunit A alpha Isoform | 75.38% | 9  | 17 | 46  | 298  | 1.024 | 18.3 | 85  | 1.912 | 23.1  | 17 | 0.579 | 31.2  | 18  | 0.773 | 21.5  | 3  | 589  | 65.3  | 5.11  |
| IP00848328.1 | Similar to Peroxisomal enoyl-coenzyme A hydratase-like protein                    | 69.69% | 4  | 1  | 23  | 94   | 1.476 | 17.8 | 10  | 1.004 | 5.7   | 2  | 1.555 | 26.9  | 5   | 1.144 | 9.2   | 3  | 320  | 35.9  | 7.42  |
| IP00794202.5 | Similar to Y8-1 protein                                                           | 44.51% | 1  | 1  | 17  | 391  | 0.768 | 22.3 | 20  | 0.706 | 42.2  | 9  | 1.117 | 11.5  | 94  | 1.158 | 14.9  | 4  | 346  | 38.4  | 10.07 |
| IP00217961.1 | Small nuclear ribonucleoprotein Sm D2                                             | 79.66% | 2  | 8  | 14  | 110  | 1.324 | 21.5 | 17  | 1.175 | 1.8   | 3  | 1.091 | 10.5  | 18  | 0.914 | 10.1  | 2  | 118  | 13.5  | 9.95  |
| IP00841765.1 | Isoform 3 of Spectrin alpha chain, brain                                          | 90.46% | 3  | 2  | 287 | 2956 | 1.292 | 19.0 | 724 | 0.986 | 30.7  | 55 | 0.764 | 32.1  | 24  | 0.961 | 54.8  | 35 | 2452 | 282.1 | 5.34  |
| IP00140420.4 | Staphylococcal nuclease domain-containing protein 1                               | 73.63% | 4  | 32 | 79  | 585  | 1.369 | 14.8 | 66  | 1.375 | 28.4  | 16 | 2.061 | 19.1  | 59  | 0.749 | 61.8  | 11 | 910  | 101.9 | 7.17  |
| IP00411559.2 | Isoform 1 of Structural maintenance of chromosomes protein 4                      | 68.56% | 10 | 37 | 119 | 645  | 1.217 | 18.8 | 64  | 1.426 | 30.8  | 31 | 0.824 | 31.1  | 9   | 1.027 | 62.7  | 16 | 1208 | 147.3 | 6.79  |
| IP00219299.4 | Talin-2                                                                           | 62.90% | 4  | 16 | 152 | 608  | 1.051 | 16.1 | 37  | 1.566 | 31.2  | 5  | 1.990 | 1.7   | 7   | 1.138 | 1.2   | 3  | 2542 | 271.4 | 5.57  |
| IP00305692.5 | Thioredoxin-like protein 1                                                        | 62.98% | 2  | 12 | 16  | 173  | 1.284 | 34.9 | 40  | 1.192 | 19.1  | 11 | 0.612 | 17.6  | 9   | 1.203 | 18.3  | 2  | 289  | 32.2  | 4.96  |
| IP00381461.5 | Isoform 1 of Thymocyte nuclear protein 1                                          | 88.00% | 3  | 6  | 24  | 97   | 1.456 | 47.4 | 10  | 0.880 | 117.0 | 2  | 1.699 | 15.7  | 5   | 1.216 | 71.8  | 3  | 225  | 25.7  | 9.25  |
| IP00104050.3 | Thyroid hormone receptor-associated protein 3                                     | 66.70% | 2  | 11 | 96  | 312  | 1.708 | 32.8 | 12  | 3.448 | 24.3  | 8  | 0.726 | 32.1  | 10  | 0.768 | 27.8  | 3  | 955  | 108.6 | 10.15 |
| IP00001159.1 | Transcriptional activator GCN1                                                    | 71.43% | 1  | 79 | 199 | 865  | 1.178 | 18.7 | 68  | 2.026 | 65.1  | 56 | 1.491 | 24.5  | 54  | 1.629 | 37.5  | 1  | 2671 | 292.6 | 7.47  |
| IP00815712.2 | Uncharacterized protein                                                           | 61.84% | 10 | 33 | 119 | 721  | 1.424 | 30.9 | 27  | 1.264 | 81.8  | 18 | 0.771 | 36.1  | 22  | 1.264 | 99.1  | 31 | 1526 | 156.0 | 8.97  |
| IP00018434.1 | Isoform 1 of Tumor susceptibility gene 101 protein                                | 60.00% | 3  | 13 | 30  | 206  | 1.441 | 11.0 | 43  | 1.289 | 16.1  | 6  | 0.447 | 80.9  | 4   | 1.547 | 65.1  | 2  | 390  | 43.9  | 6.46  |
| IP00514689.2 | Uncharacterized protein                                                           | 74.75% | 2  | 1  | 29  | 232  | 1.242 | 25.0 | 16  | 1.321 | 4.8   | 3  | 1.529 | 26.7  | 9   | 0.842 | 18.9  | 3  | 305  | 33.0  | 9.89  |
| IP00031526.3 | Uncharacterized protein C1orf43                                                   | 50.57% | 1  | 5  | 13  | 82   | 1.399 | 16.8 | 8   | 1.148 | 57.1  | 3  | 0.956 | 20.6  | 5   | 0.852 | 127.6 | 2  | 176  | 18.4  | 9.44  |
| IP00031651.1 | Uncharacterized protein C1orf50                                                   | 56.70% | 4  | 7  | 10  | 133  | 0.611 | 21.9 | 19  | 0.646 | 60.6  | 9  | 1.120 | 31.1  | 11  | 1.246 | 34.3  | 5  | 194  | 22.1  | 9.64  |
| IP00107104.1 | UPF3B8 protein Ciof26                                                             | 68.67% | 2  | 14 | 22  | 124  | 1.398 | 18.2 | 30  | 1.195 | 23.9  | 4  | 0.779 | 13.3  | 2   | 0.497 | 60.9  | 4  | 233  | 26.0  | 4.79  |
| IP00011997.4 | Isoform 1 of UPF048 protein Ciof33                                                | 84.28% | 2  | 8  | 20  | 139  | 1.321 | 34.3 | 5   | 0.934 | 38.0  | 32 | 0.938 | 13.5  | 5   | 0.921 | 2.1   | 3  | 229  | 25.0  | 9.95  |
| IP00006980.1 | UPF058 protein C1orf166                                                           | 86.07% | 6  | 17 | 25  | 272  | 1.698 | 13.5 | 42  | 1.152 | 29.5  | 15 | 1.355 | 26.5  | 32  | 1.635 | 200.5 | 2  | 244  | 28.1  | 6.65  |
| IP00412244.2 | WD repeat-containing protein 11                                                   | 58.88% | 2  | 19 | 65  | 285  | 1.163 | 22.8 | 41  | 1.278 | 18.0  | 10 | 1.024 | 14.1  | 3   | 0.793 | 60.9  | 2  | 1224 | 136.6 | 6.92  |
| IP00910815.2 | WNA FLJ6104, highly similar to WW domain-binding protein 11                       | 52.88% | 3  | 17 | 42  | 229  | 1.468 | 31.2 | 23  | 0.819 | 24.0  | 5  | 1.179 | 21.8  | 14  | 0.618 | 114.6 | 3  | 607  | 66.8  | 8.07  |
| IP00250153.8 | Y-box binding protein 2                                                           | 69.23% | 2  | 2  | 21  | 238  | 1.734 | 26.4 | 26  | 0.706 | 42.2  | 5  | 1.051 | 5.8   | 62  | 1.271 | 14.9  | 2  | 364  | 38.5  | 10.80 |
| IP00306043.1 | Isoform 1 of YTH domain family protein 2                                          | 45.60% | 5  | 12 | 33  | 235  | 1.308 | 25.0 | 31  | 1.073 | 45.1  | 8  | 2.148 | 8.5   | 10  | 1.158 | 165.4 | 2  | 579  | 62.3  | 8.79  |
| IP01010975.1 | Uncharacterized protein                                                           | 52.81% | 6  | 10 | 32  | 147  | 1.598 | 9.9  | 11  | 0.641 | 116.9 | 9  | 1.181 | 13.5  | 3   | 1.556 | 65.1  | 3  | 392  | 44.9  | 7.36  |
| IP00218866.2 | Isoform 2 of Zinc finger Ran-binding domain-containing protein 2                  | 73.13% | 2  | 7  | 31  | 174  | 1.067 | 48.7 | 5   | 1.937 | 7.2   | 2  | 1.429 | 147.3 | 4   | 1.283 | 17.0  | 3  | 320  | 36.3  | 9.76  |
